# Supplementary material for: Molecular basis of tRNA recognition by the Elongator complex
Source: PubMed Central journal article supplement — Sci Adv. 2019 Jul 10;5(7):eaaw2326. doi: 10.1126/sciadv.aaw2326 (PMC6620098; doi:10.1126/sciadv.aaw2326), 2019-07-10
Supplement: aaw2326_SM.pdf [file aaw2326_SM.pdf]

## Supplementary Materials for

### **Molecular basis of tRNA recognition by the Elongator complex**

Maria I. Dauden, Marcin Jaciuk, Felix Weis, Ting-Yu Lin, Carolin Kleindienst, Nour El Hana Abbassi, Heena Khatter, Rościsław Krutyhołowa, Karin D. Breunig, Jan Kosinski\*, Christoph W. Müller\*, Sebastian Glatt\*

\*Corresponding author. Email: [kosinski@embl.de](mailto:kosinski@embl.de) (J.K.); [cmueller@embl.de](mailto:cmueller@embl.de) (C.W.M.); [sebastian.glatt@uj.edu.pl](mailto:sebastian.glatt@uj.edu.pl) (S.G.)

Published 10 July 2019, *Sci. Adv.* **5**, eaaw2326 (2019)  
DOI: 10.1126/sciadv.aaw2326

#### **The PDF file includes:**

- Fig. S1 Elp123 cryo-EM reconstruction.
- Fig. S2. Atomic structure of the Elp1 N terminus and intersubunit contacts.
- Fig. S3. Structural comparison of individual Elongator subunits.
- Fig. S4. Cryo-EM reconstruction of Elp123-tRNA.
- Fig. S5. Cryo-EM reconstruction of Elp123 bound to two tRNAs.
- Fig. S6. In vivo and in vitro characterization of Elongator mutants.
- Table S1. Collection and refinement statistics.
- Table S2. Yeast strains used in this study.

#### **Other Supplementary Material for this manuscript includes the following:**

(available at [advances.sciencemag.org/cgi/content/full/5/7/eaaw2326/DC1](https://advances.sciencemag.org/cgi/content/full/5/7/eaaw2326/DC1))

Movie S1 (.mp4 format). Conformational changes of Elp123 upon tRNA binding.

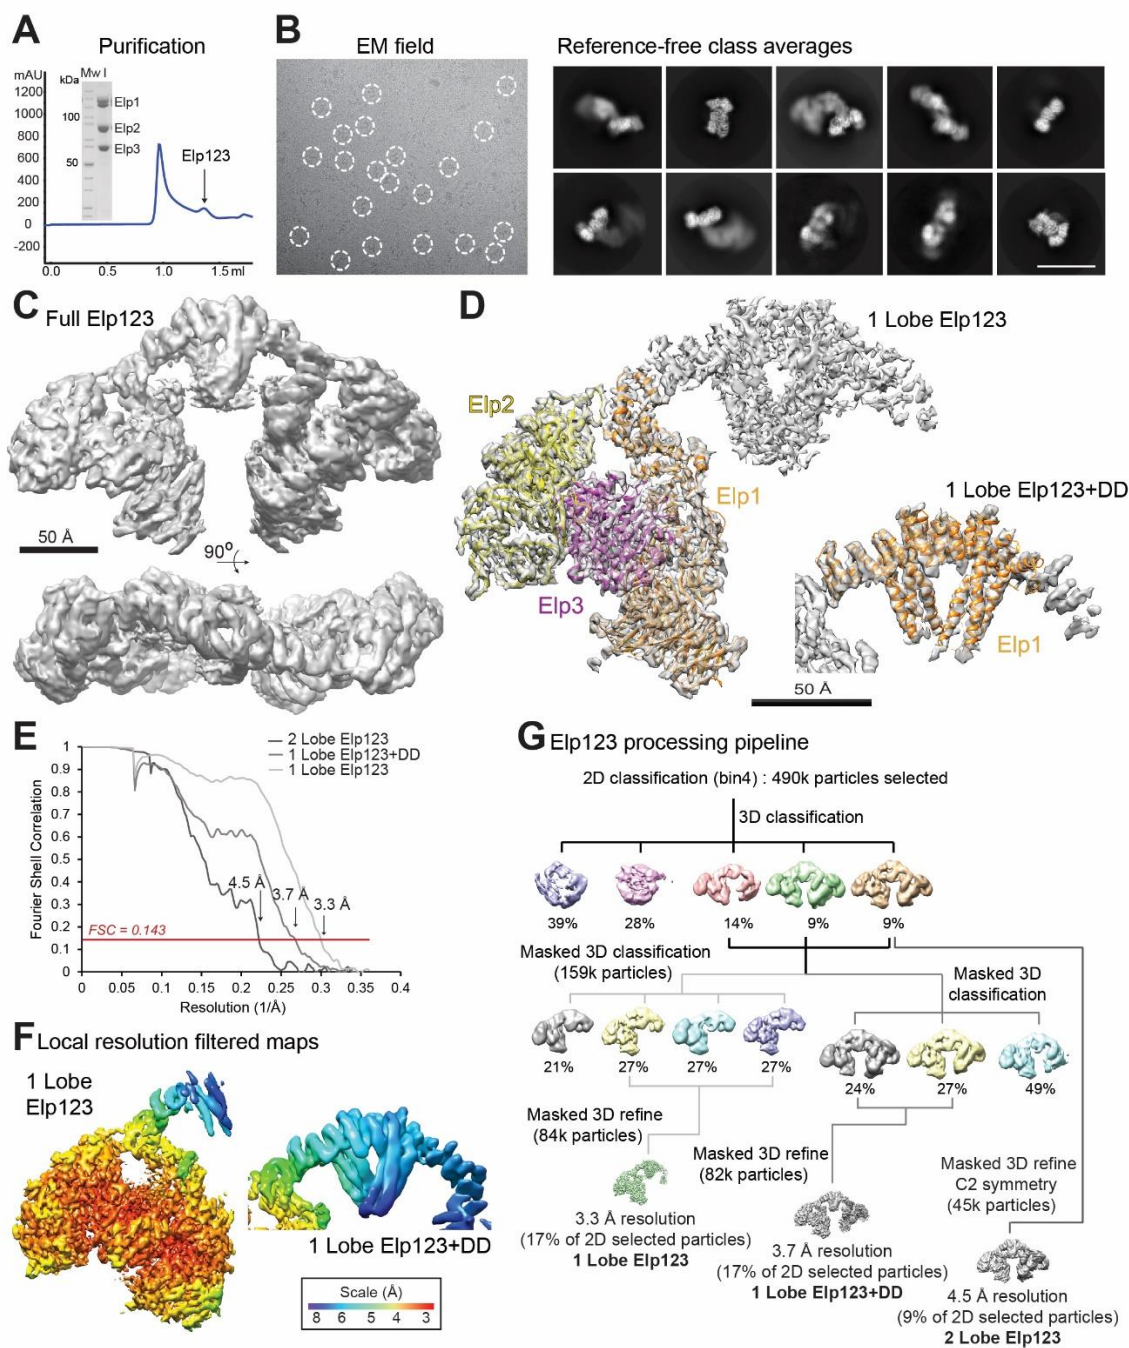

**Fig. S1 Elp123 cryo-EM reconstruction.** (A) SDS-PAGE gel showing the purified Elp123 complex and corresponding gel filtration profile. (B) Representative cryo-EM field of the Elp123 complex. Particles are highlighted. Reference-free class averages of the Elp123 dataset. Scale bar, 20 nm (right). (C) Two lobed reconstruction of the Elp123 at 4.5 Å resolution. (D) Local maps of the Elp123 lobe with and without the DD of Elp1 and the resulting atomic models. (E) Fourier Shell Correlation curve for different Elp123 reconstructions. The red line indicates FSC=0.143 and the individual resolution cutoffs are labeled. (F) The resolution range of the Elp123 lobe map is displayed on the local resolution filtered map. (G) General processing pipeline.





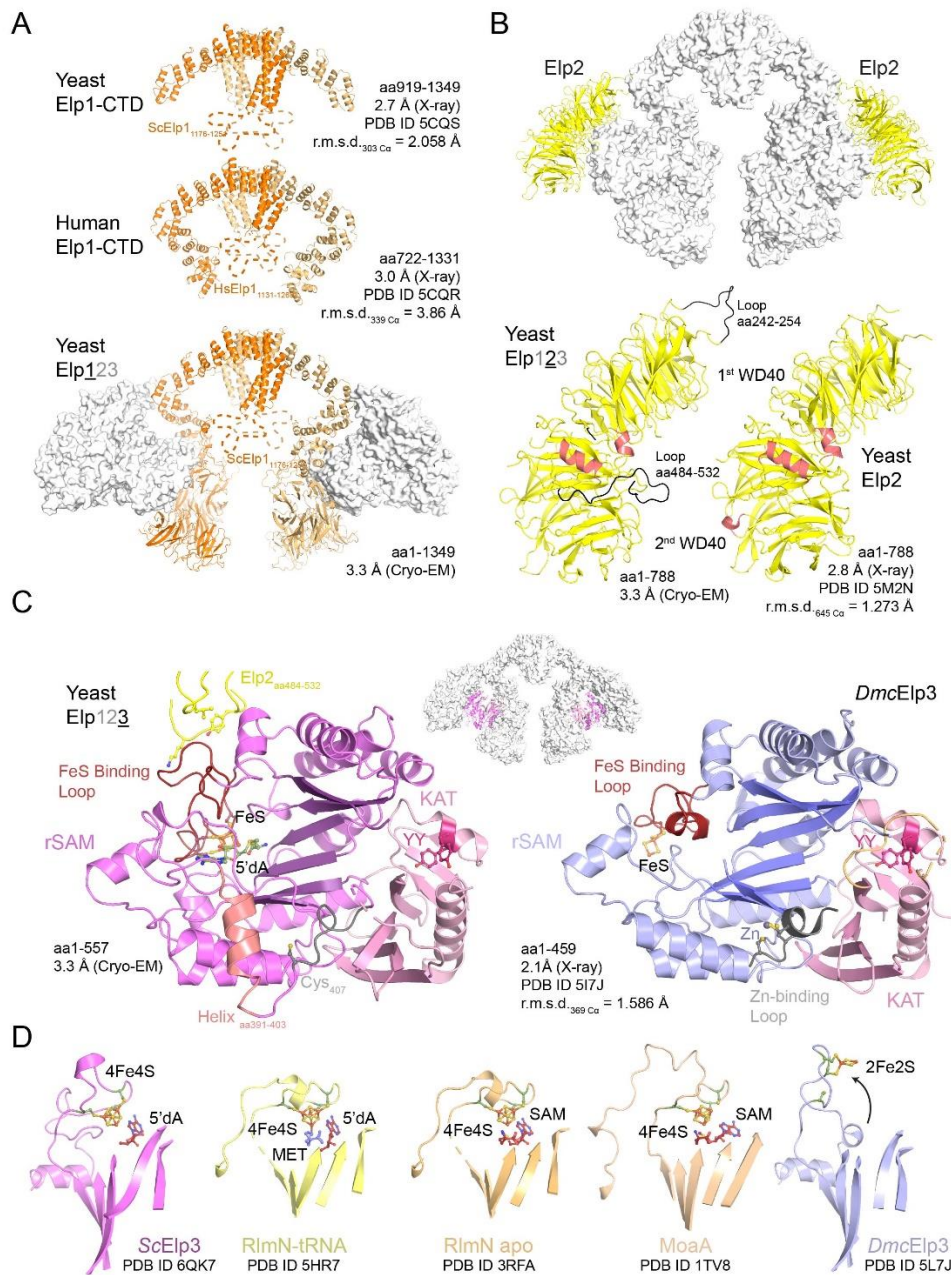

**Fig. S3. Structural comparison of individual Elongator subunits.** (A) Structural comparison between available crystal structures of the DD domain of yeast (PDB ID 5CQS) and human Elp1 (PDB ID 5CQR) with *ScElp1* in the apo Elp123 complex. (B) Structural comparison between the available crystal structure of yeast Elp2 (PDB ID 5M2N) with *ScElp2* in the apo Elp123 complex. (C) Structural comparison between the available crystal structure of *DmcElp3* (PDB ID 5L7J) with *ScElp3* in the apo Elp123 complex (PDB ID 6QK7). (D) Close up comparison between the position of the FeS cluster (orange/yellow) and SAM molecules (red) in *ScElp3* with other rSAM proteins (RlmN PDB ID 5HR7/3RFA; MoaA PDB ID 1TV8) and *DmcElp3*. The structural models of the other subunits are depicted using white surface representation.

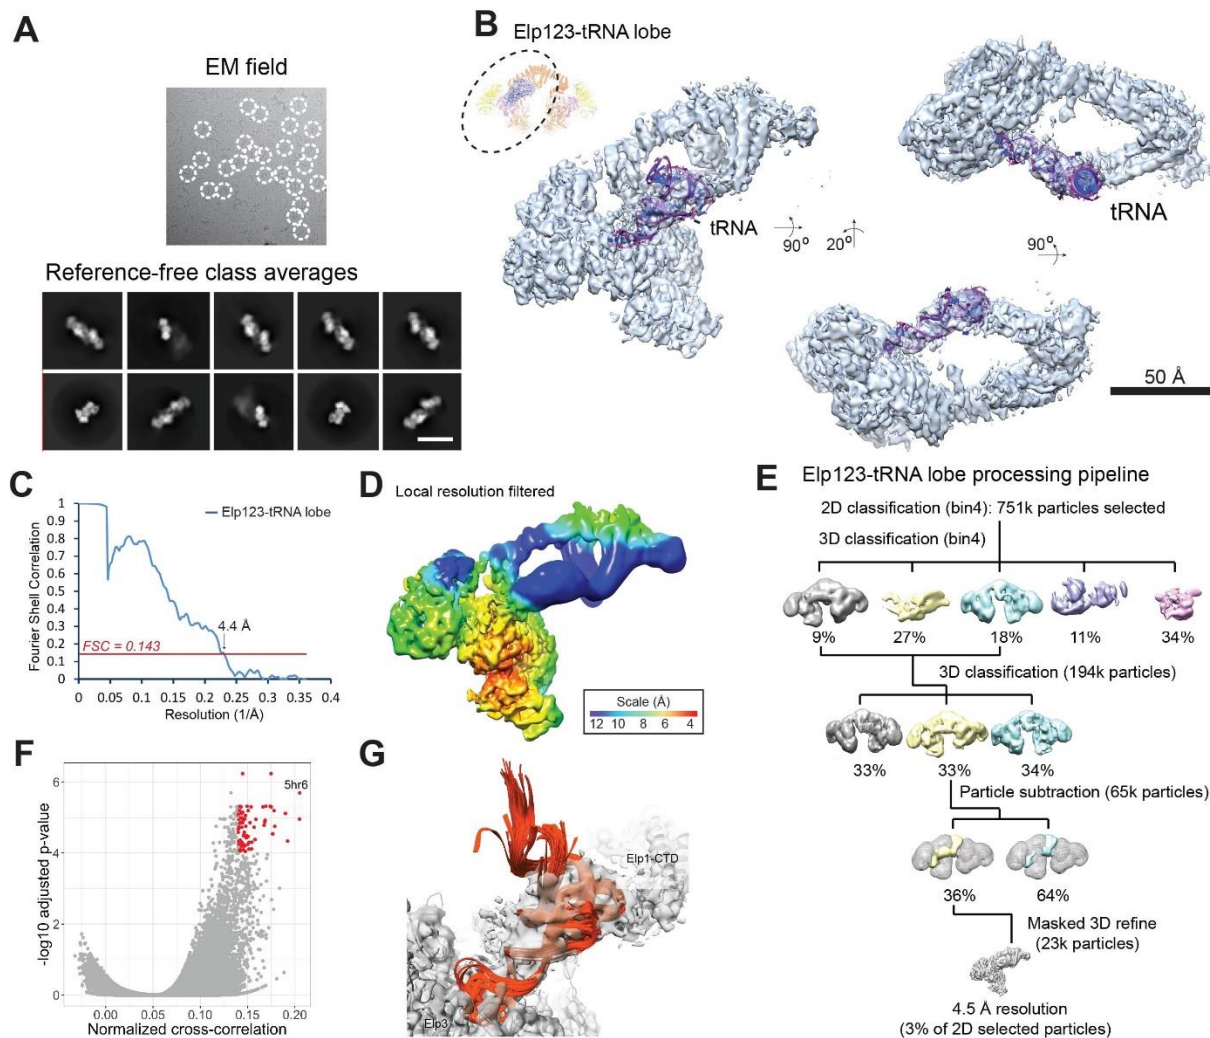

**Fig. S4. Cryo-EM reconstruction of Elp123-tRNA.** (A) Representative cryo-EM field of the Elp123-tRNA complex. Particles are highlighted. Reference-free class averages of the Elp123 dataset. Scale bar, 20 nm (right). (B) Different lobe reconstruction of the Elp123-tRNA complex from different perspectives showing representative densities and the fitted tRNA model. (C) Fourier Shell Correlation curve for the Elp123-tRNA reconstruction. The red line indicates FSC=0.143 and the resolution cutoff is labeled. (D) The resolution range of the Elp123-tRNA reconstruction is displayed on the local resolution filtered map. (E). General processing pipeline. (F) The volcano plot showing the fitting score (normalized “cross-correlation about the mean” calculated with UCSF Chimera, x-axis) versus the  $-\log_{10}$  adjusted p-values (y-axis) for around 4,000,000 alternative fits of the 802 tRNA structures retrieved from the Protein Data Bank. The top fits with the score higher than 0.15 and the  $-\log_{10}$  p-value higher than 4 (p-value lower than  $10^{-4}$ ) are colored red. “5hr6” indicates the PDB ID of the tRNA template used for modeling of the tRNA<sup>A1a</sup>. See Methods for how the fitting was performed and how the p-values have been calculated. (G) The top fits depicted in ribbon representation (orange red) within the EM map (grey envelope).

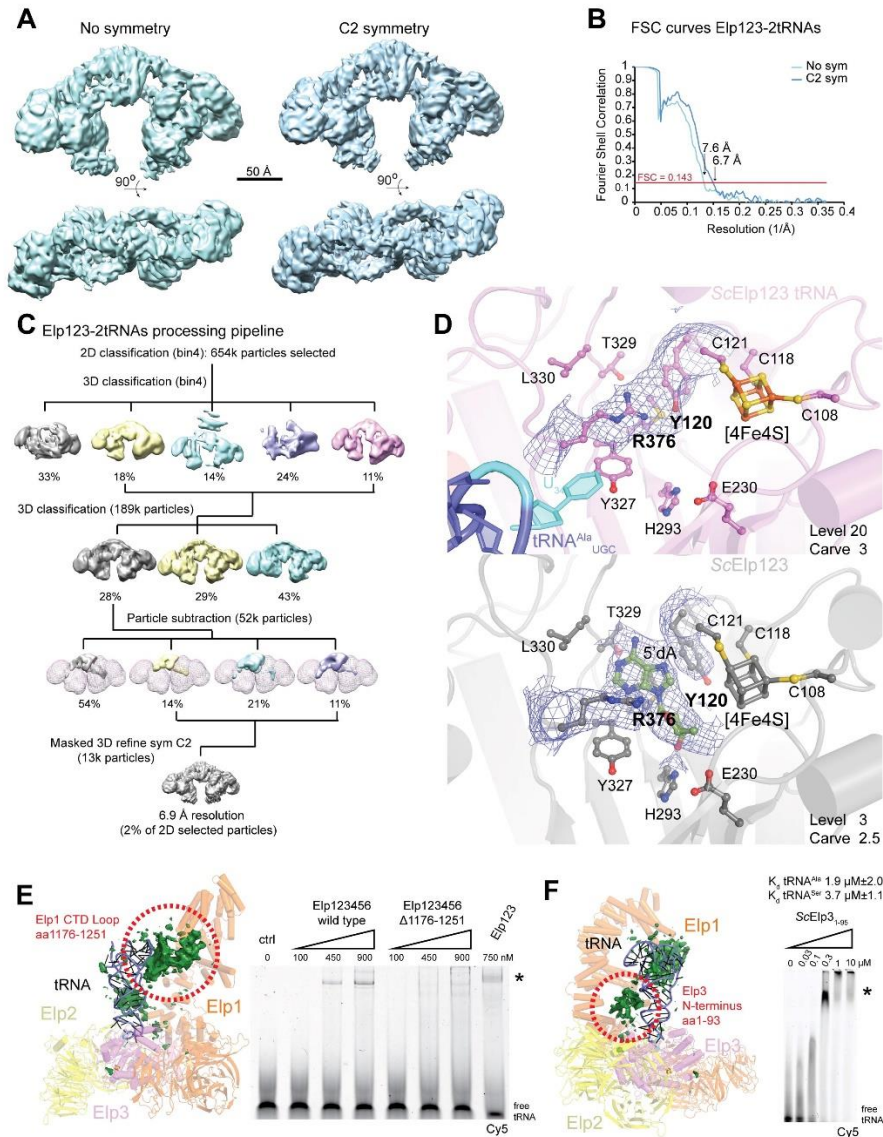

**Fig. S5. Cryo-EM reconstruction of Elp123 bound to two tRNAs.** (A) Different lobe reconstruction of the Elp123-2tRNA complex showing non-symmetrized (left) and symmetrized (right) densities from different perspectives. (B) Fourier Shell Correlation curve for non-symmetrized (light blue) and symmetrized (blue) Elp123-2tRNA reconstructions. The red line indicates FSC=0.143 and the resolution cutoff is labeled. (C) General processing pipeline. (D) Close up of the Elp3 active site in the tRNA-bound (top, colored) and unbound (bottom, grey) Elp123 structures. Cryo-EM densities for potentially rearranged residues (Y120 and R376; bold) and 5'dA (green) are shown at given threshold levels and carve values. Residue numbers, tRNA bases and FeS cluster are labeled (E) Model of Elp123-tRNA showing additional densities (green) that were not described by the model (left). EMSA assay using different concentrations of endogenous Elp123, recombinant Elongator complex and fluorescently labelled tRNA<sup>Ala</sup><sub>UGC</sub>. Wild type and mutated Elongator were used and free tRNA and protein-tRNA complex (\*) are indicated. (F) Same as D using purified N-terminus of Elp3 (aa1-95). Binding affinities from quantitative MST experiments are shown, n=3.



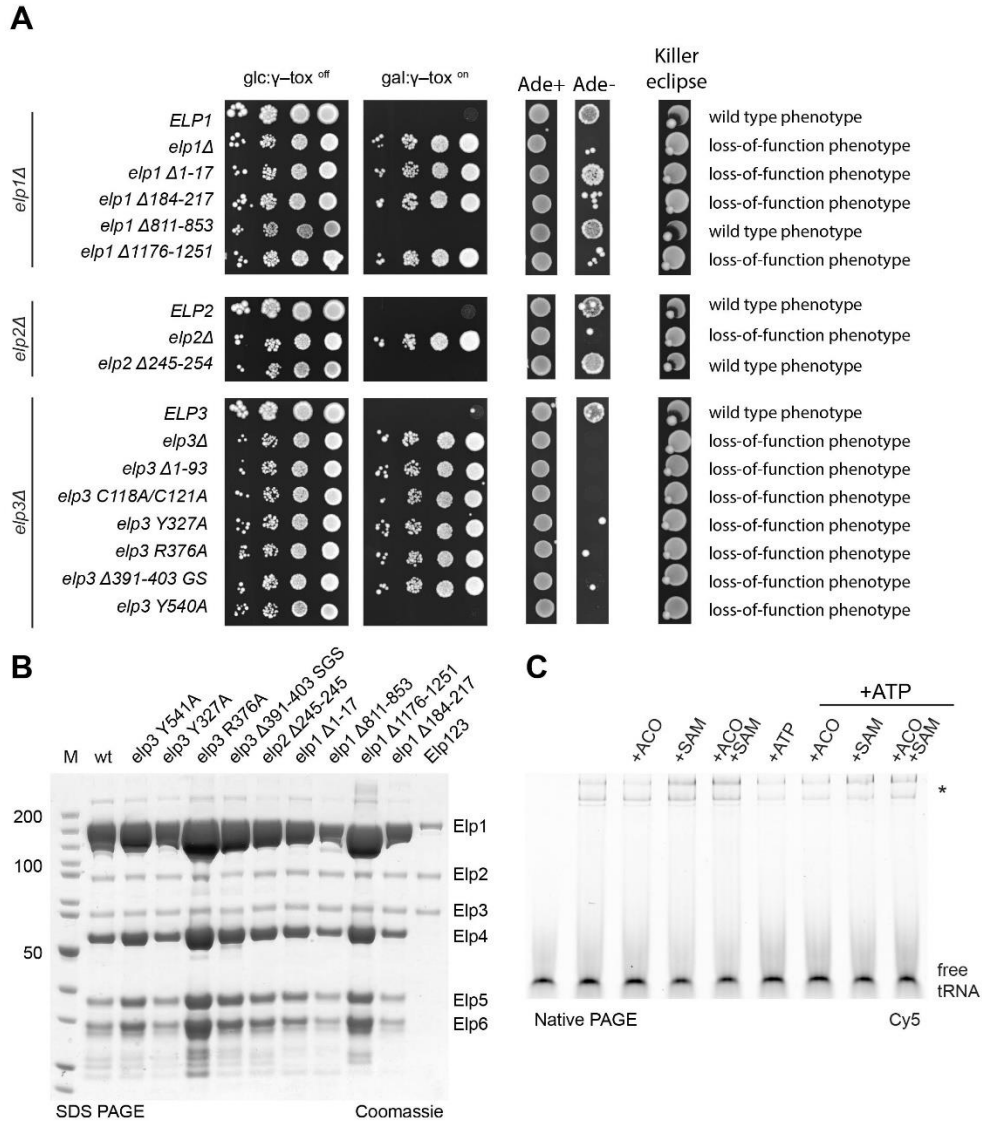

**Fig. S6. In vivo and in vitro characterization of Elongator mutants.** (A) Phenotypes of yeast strains carrying the indicated *elp1*, *elp2* and *elp3* mutant alleles using  $\gamma$ -toxin assay (transformation with galactose inducible GAL1- $\gamma$ -toxin expression plasmid pLF16), *SUP4* suppression (growth on medium lacking adenine) and killer eclipse assays (*S. cerevisiae* strains inoculated with *K. lactis* killer strain AWJ137). Non-functional Elongator confers resistance against zymocin, but inhibits growth without adenine.  $\gamma$ -toxin, *SUP4* suppression and killer eclipse assays are described in detail in the Materials and Methods section. The zymocin resistance phenotype of *elp* mutants shown in Fig. 5C perfectly correlates with loss of *SUP4* mediated nonsense suppression creating an *Ade*<sup>-</sup> phenotype and the insensitivity to the zymocin secreted by a so-called killer strain AWJ137 of *Kluyveromyces lactis* confirming the loss of U<sub>34</sub> tRNA modification. (B) SDS PAGE analysis of different purified Elongator variants. Amounts of proteins were normalized for Elp3 and visualized using Coomassie stain. (C) EMSA assay using recombinant Elongator and fluorescently labelled tRNA<sup>Ala</sup><sub>UGC</sub> in the presence of different combinations of acetyl-CoA (ACO), SAM and ATP. The positions of free tRNA and protein-tRNA complexes (\*) are indicated next to the native PAGE.

**Table S1. Collection and refinement statistics.**

|                                                     | <b>ScElp123</b><br><b>(EMD-4571)</b><br><b>(PDB 6QK7)</b> | <b>ScElp123-tRNA</b><br><b>(EMD-4574)</b> | <b>ScElp123-2tRNAs</b><br><b>(EMD-4576)</b> |
|-----------------------------------------------------|-----------------------------------------------------------|-------------------------------------------|---------------------------------------------|
| <b>Data collection and processing</b>               |                                                           |                                           |                                             |
| Magnification                                       | 105,000 x                                                 | 105,000 x                                 | 105,000 x                                   |
| Voltage                                             | 300 kV                                                    | 300 kV                                    | 300 kV                                      |
| Electron exposure (e <sup>-</sup> /Å <sup>2</sup> ) | 43                                                        | 44                                        | 39.8                                        |
| Defocus range (μm)                                  | 1-2.5                                                     | 1-2.5                                     | 1-2.5                                       |
| Pixel size (Å)                                      | 1.35                                                      | 1.35                                      | 1.35                                        |
| Symmetry imposed                                    | Yes                                                       | no                                        | yes                                         |
| Initial images (no.)                                | 4614                                                      | 6990                                      | 5412                                        |
| Final particle (no.)                                | 84,135                                                    | 23,020                                    | 12,921                                      |
| Map resolution (Å)                                  | 3.3                                                       | 4.4                                       | 6.7                                         |
| FSC threshold                                       | 0.143                                                     | 0.143                                     | 0.143                                       |
| Map resolution range (Å)                            | 3-5                                                       | 4-12                                      | -                                           |
| <b>Refinement</b>                                   |                                                           |                                           |                                             |
| Map sharpening B factor (Å <sup>2</sup> )           | -20                                                       | -40                                       | -70                                         |
| <b>Model Composition</b>                            |                                                           |                                           |                                             |
| Non-hydrogen atoms                                  | 20,790                                                    |                                           |                                             |
| Protein residues                                    | 2,594                                                     |                                           |                                             |
| Ligand                                              | 26                                                        |                                           |                                             |
| <b>R. m. s deviations</b>                           |                                                           |                                           |                                             |
| Bond lengths (Å)                                    | 0.0050                                                    |                                           |                                             |
| Bond angles (°)                                     | 1.07                                                      |                                           |                                             |
| <b>Validation</b>                                   |                                                           |                                           |                                             |
| MolProbity score                                    | 1.87                                                      |                                           |                                             |
| Clashscore                                          | 6.27                                                      |                                           |                                             |
| Poor rotamers (%)                                   | 0.49                                                      |                                           |                                             |
| <b>Ramachandran plot</b>                            |                                                           |                                           |                                             |
| Favored (%)                                         | 90.68                                                     |                                           |                                             |
| Allowed (%)                                         | 9.32                                                      |                                           |                                             |
| Disallowed (%)                                      | 0.00                                                      |                                           |                                             |



**Table S2. Yeast strains used in this study.**

| <b>Strain</b> | <b>Relevant genotype</b>                                                                                                                     | <b>Source</b>      |
|---------------|----------------------------------------------------------------------------------------------------------------------------------------------|--------------------|
| AWJ137        | <i>MATa, leu2, trp1, [k1+k2+]</i>                                                                                                            | Kamper et al. (64) |
| UMY2893       | <i>MAT<math>\alpha</math> SUP4 leu2-3,112 trp1-1 can1-100 ura3-1 ade2-1 his3-11,15</i>                                                       | Huang et al. (23)  |
| SCCM49        | <i>MATa; his3<math>\Delta</math>1; leu2<math>\Delta</math>0; met15<math>\Delta</math>0, ura3<math>\Delta</math>0; YLR384C-3xFLAG::natNT2</i> | this study         |
| CKY27         | UMY2893, <i>elp1<math>\Delta</math>::KIURA3</i>                                                                                              | this study         |
| CKY28         | UMY2893, <i>elp2<math>\Delta</math>::KIURA3</i>                                                                                              | this study         |
| CKY29         | UMY2893, <i>elp3_<math>\Delta</math>391-403+SGS-linker</i>                                                                                   | this study         |
| CKY30         | UMY2893, <i>elp3_R376A</i>                                                                                                                   | this study         |
| CKY31         | UMY2893, <i>elp2_<math>\Delta</math>245-254</i>                                                                                              | this study         |
| CKY32         | UMY2893, <i>elp3_Y327A</i>                                                                                                                   | this study         |
| CKY34         | UMY2893, <i>elp1_<math>\Delta</math>184-217</i>                                                                                              | this study         |
| CKY36         | UMY2893, <i>elp1_<math>\Delta</math>1176-1251</i>                                                                                            | this study         |
| CKY37         | UMY2893, <i>elp1_<math>\Delta</math>811-853</i>                                                                                              | this study         |
| CKY38         | UMY2893, <i>elp3_<math>\Delta</math>1-93</i>                                                                                                 | this study         |
| CKY39         | UMY2893, <i>elp1_<math>\Delta</math>1-17</i>                                                                                                 | this study         |
| ONY14         | UMY2893, <i>elp3<math>\Delta</math>::KIURA3</i>                                                                                              | Glatt et al. (29)  |
| RZY91         | UMY2893, <i>elp3_Y540-(myc)<sub>3</sub>::SpHIS5</i>                                                                                          | R. Zabel           |
| RZY106        | UMY2893, <i>elp3_C118A/C121A-(myc)<sub>3</sub>::SpHIS5</i>                                                                                   | R. Zabel           |
